# Supplementary material
Source: Springer Nature journal article supplement (https://www.springermedizin.de/resource/supplementary/13014_2007_65_MOESM3_ESM.pdf/9632834)

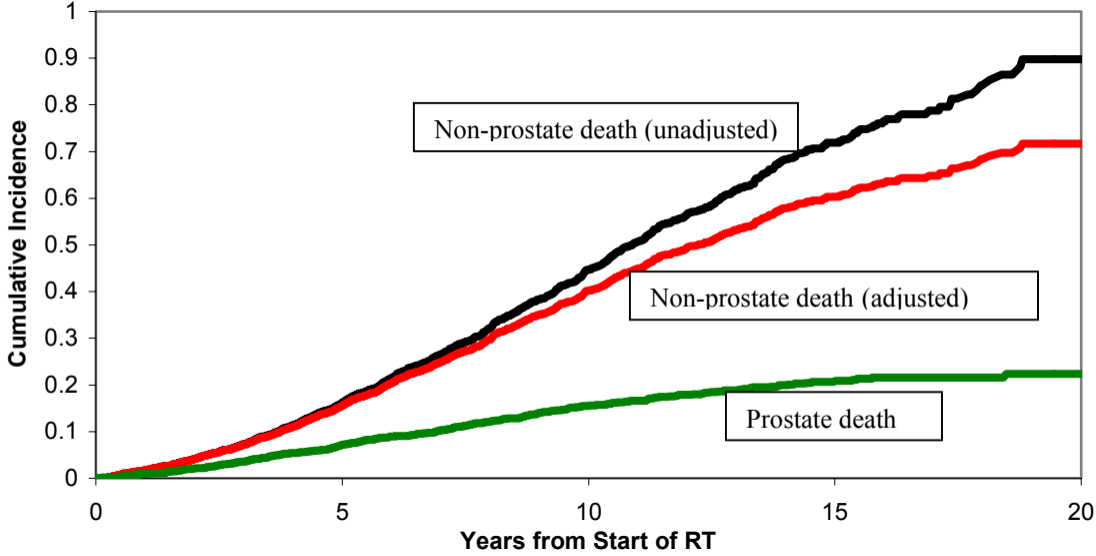

Supplement: MOESM3 [file 9632834]
